# Supplementary material for: Total Knee Arthroplasty Improves Locomotive Syndrome in Patients with Knee Disease: A Prospective Cohort Study Focused on Total Clinical Decision Limits Stage 3
Source: Research Square preprint supplement (doi:10.21203/rs.3.rs-136953/v1), 2021-01-05
Supplement: Supplementary file 2 [file 343102d07230d82a6ebdccbd.xlsx]

## Sheet: Table 3
Table 3. Changes in the three LS test scores and each functional parameter from before to three months after TKA
	Before TKA	Three months after TKA	Paired t-test p-value
Stand-up test	1.80 ± 0.81	1.88 ± 0.77	0.34
Two-step test	0.86 ± 0.22	0.92 ± 0.21	0.018*
GLFS-25	36.9 ± 13.0	25.9 ± 18.3	< 0.001***
3m-TUG	12.65 ± 8.58	10.63 ± 3.20	0.054
Weight-bearing ratio	0.87 ± 0.27	1.05± 0.39	< 0.001***
Cadence (operated side)	106.2 ± 20.9	108.7 ± 15.9	0.281
Stride time (operated side)	1.19 ± 0.35	1.14 ± 0.25	0.26
Step time (operated side)	0.60 ± 0.18	0.56 ± 0.14	0.107
Single support time (operated side)	0.38 ± 0.08	0.41 ± 0.07	0.026*
Double support time (operated side)	0.39 ± 0.26	0.32 ± 0.15	0.047*
Stride length (operated side)	0.77 ± 0.21	0.82 ± 0.18	0.054
Step length (operated side)	0.39 ± 0.11	0.42 ± 0.09	0.008**
Walking speed	0.69 ± 0.25	0.75 ± 0.20	0.046*
Significantly different: *p < .05, **p < .01, ***p < .001
