# Supplementary material for: Total Knee Arthroplasty Improves Locomotive Syndrome in Patients with Knee Disease: A Prospective Cohort Study Focused on Total Clinical Decision Limits Stage 3
Source: Research Square preprint supplement (doi:10.21203/rs.3.rs-136953/v1), 2021-01-05
Supplement: Supplementary file 3 [file 568c20a93b2b2c32069d6591.xlsx]

## Sheet: Table 5
Table 5. Stepwise multiple logistic regression analysis between improvement effects of total CDL stage and various locomotive tests before TKA
Variable	B	Exp(B)	95 % CI	p-value
Two-step test (CDL stage 0, 1, 2, and 3)	-1.966	0.14	0.043 - 0.461	0.001**
Stand-up test (CDL stage 0, 1, 2, and 3)	-1.536	0.215	0.057 - 0.809	0.023*
Weight-bearing ratio	-3.742	0.024	0.001 - 0.790	0.036*
Constant	9.744
Nagelkerke R2	0.518
Significantly different: *p < .05, **p < .01
