# Supplementary material for: Total Knee Arthroplasty Improves Locomotive Syndrome in Patients with Knee Disease: A Prospective Cohort Study Focused on Total Clinical Decision Limits Stage 3
Source: Research Square preprint supplement (doi:10.21203/rs.3.rs-136953/v1), 2021-01-05
Supplement: Supplementary file 4 [file 92a8d3c09fa74839ce4be2ef.xlsx]

## Sheet: Table 2
Table 2. Distribution of the CDL stage for the three LS tests and the total CDL stage
		stage 0			stage 1			stage 2			stage 3		Wilcoxon Signed-Rank Test
		N	%		N	%		N	%		N	%	p-value
Stand-up test	Before TKA	0	0		9	15.3		31	52.5		19	32.2	0.336
	Three months after TKA	2	3.4		7	11.9		34	57.6		16	27.1
Two-step test	Before TKA	0	0		9	15.3		19	32.2		31	52.5	0.048*
	Three months after TKA	1	1.7		10	16.9		25	42.4		23	39
GLFS-25	Before TKA	0	0		1	1.7		7	11.9		51	86.4	< 0.001***
	Three months after TKA	6	10.2		12	20.3		13	22		28	47.5
Total CDL stage	Before TKA	0	0		0	0		0	0		59	100	< 0.001***
	Three months after TKA	0	0		3	5.1		14	23.7		42	71.2
Significantly different: *p < .05 ***p < .001
