# Supplementary material for: Total Knee Arthroplasty Improves Locomotive Syndrome in Patients with Knee Disease: A Prospective Cohort Study Focused on Total Clinical Decision Limits Stage 3
Source: Research Square preprint supplement (doi:10.21203/rs.3.rs-136953/v1), 2021-01-05
Supplement: Supplementary file 6 [file 04b45d8f8f9556d2a79aa9af.xlsx]

## Sheet: Table 1
Table 1. Subjects' characteristics
Characteristic	Total (n = 59)
Age (y)	73.5 ± 7.3
Sex (male)	10
Height (cm)	150.8 ± 8.5
Weight (kg)	61.1 ± 9.9
Body mass index (BMI) (kg/m2)	26.9 ± 4.0
Age, height, weight, and BMI values are means ± standard deviation.
