# Supplementary material for: Total Knee Arthroplasty Improves Locomotive Syndrome in Patients with Knee Disease: A Prospective Cohort Study Focused on Total Clinical Decision Limits Stage 3
Source: Research Square preprint supplement (doi:10.21203/rs.3.rs-136953/v1), 2021-01-05
Supplement: Supplementary file 7 [file f8900074c895ab00a51d8cc9.xlsx]

## Sheet: Table 4
Table 4. Differences in the preoperative test scores and various preoperative functional parameters between the improvement group and the non-improvement group
		Improvement group (n=17)	Non-improvement group (n=42)	Unpaired t-test p-value
	Age (y)	72.7 ± 5.8	73.9 ± 7.9	0.589
	BMI (kg/m2)	27.4 ± 4.3	26.7 ± 3.9	0.544
Before TKA	Stand-up test	2.12± 0.60	1.67 ± 0.85	0.05
	Two-step test	1.04 ± 0.13	0.79 ± 0.20	<0.001***
	GLFS-25	30.8 ± 9.2	39.4 ± 13.6	0.007**
	3m-TUG	9.16 ± 1.19	14.10 ± 9.85	0.003**
	Weight-bearing ratio	0.75 ± 0.16	0.92 ± 0.29	0.032*
	Cadence (operated side)	112.8 ± 13.6	103.5 ± 22.8	0.125
	Stride time (operated side)	1.08 ± 0.13	1.24 ± 0.40	0.116
	Step time (operated side)	0.55± 0.06	0.62 ± 0.20	0.055
	Single support time (operated side)	0.38 ± 0.06	0.38 ± 0.09	0.947
	Double support time (operated side)	0.29± 0.07	0.44 ± 0.30	0.004**
	Stride length (operated side)	0.86 ± 0.20	0.73 ± 0.20	0.032*
	Step length (operated side)	0.44 ± 0.10	0.37 ± 0.11	0.019*
	Walking speed	0.81 ± 0.25	0.64 ± 0.23	0.012*
Significantly different: *p < .05, **p < .01, ***p < .001
